# Supplementary material for: A Portable and Disposable Electrochemical Sensor Utilizing Laser-Scribed Graphene for Rapid SARS-CoV-2 Detection
Source: MDPI journal article supplement (doi:10.3390/bios14010010), 2023-12-23
Supplement: s1 [file s1]

## Supplementary Information

# A Portable and Disposable Electrochemical Sensor Utilizing Laser-Scribed Graphene for Rapid SARS-CoV-2 Detection

Runzhong Wang <sup>1,†</sup>, Bicheng Zhu <sup>1,2,3,†</sup>, Paul Young <sup>4,5</sup>, Yu Luo <sup>6</sup>, John Taylor <sup>4,5</sup>, Alan J. Cameron <sup>2,3,4,5</sup>, Christopher J. Squire <sup>4,5</sup> and Jadranka Travas-Sejdic <sup>1,2,3,\*</sup>

<sup>1</sup> Centre for Innovative Materials and Health, School of Chemical Sciences, The University of Auckland, Private Bag 92019, Auckland 1142, New Zealand; rwan316@aucklanduni.ac.nz (R.W.); bicheng.zhu@auckland.ac.nz (B.Z.)

<sup>2</sup> School of Chemical Sciences, The University of Auckland, Private Bag 92019, Auckland 1142, New Zealand; alan.cameron@auckland.ac.nz

<sup>3</sup> MacDiarmid Institute for Advanced Materials and Nanotechnology, Victoria University of Wellington, Wellington 6012, New Zealand

<sup>4</sup> School of Biological Sciences, The University of Auckland, Private Bag 92019, Auckland 1142, New Zealand; p.young@auckland.ac.nz (P.Y.); ja.taylor@auckland.ac.nz (J.T.); c.squire@auckland.ac.nz (C.J.S.)

<sup>5</sup> Maurice Wilkins Centre for Molecular Biodiscovery, The University of Auckland, Auckland 1142, New Zealand

<sup>6</sup> Micro- and Nano-Technology Research Center, State Key Laboratory for Manufacturing Systems Engineering, Xi'an Jiaotong University, Xi'an 710049, China; yuluo825@xjtu.edu.cn

\* Correspondence: j.travas-sejdic@auckland.ac.nz

† These authors contributed equally to this work.

### 1. Chemicals and materials for EsterLigase-VHH E production pyrene-E-Tag synthesis

Fmoc-amino acids were purchased from CS Bio Ltd (Shanghai, China). Hydrazine hydrate and 1-[bis(dimethylamino)methylene]-1H-1,2,3-triazolo[4,5-b]pyridinium 3-oxide hexafluorophosphate (HATU) were purchased from (AK Scientific, Union City, CA, USA). N,N-dimethylformamide (DMF; AR grade) and acetonitrile (MeCN, HPLC grade) were purchased from Thermo Scientific (Hampshire, NH, USA). Diethyl ether (Et<sub>2</sub>O) was purchased from Avantor Performance Materials (Center Valley, USA) and dichloromethane were purchased from EP Ltd. (Auckland, New Zealand). Analytical reverse phase high-performance liquid chromatography (RP-HPLC) was performed on a Waters (Waltham, MA, USA) Alliance analytical HPLC equipped with a Phenomenex (Torrance, CA, USA) Luna C18 column (100 Å, 5 µm, 4.6 mm x 250 mm) operated at room temperature, with chromatograms recorded at 214 nm and 254 nm. Semi-preparative RP-HPLC was performed on a Waters 1525 Binary HPLC pump equipped

with a Waters 2489 UV/visible detector (214 nm) using a Phenomenex Luna C18 semi-prep column (100 Å, 5 µm, 250 mm x 10 mm). For both analytical and semi-preparative RP-HPLC, solvents used were as follows: solvent A = 0.1% TFA in water (MQ H<sub>2</sub>O) and solvent B = 0.1% TFA in MeCN.

## 2. The calculation of the limit of detection

The calculation of the limit of detection (LOD) is based on the Signal-to-Noise Approach [1], where three times the sensor response from a blank buffer solution (PBS) was utilised. After measurements of the blank signal trice, the average value of  $\Delta R_{ct}/R_{ct}^0$  was 0.0151 for LSGE, and the calibration equation for the LSG-based sensor was  $\Delta R_{ct}/R_{ct}^0 = 0.0866 \times \lg[\text{SP-RBD}] + 1.0078$ . Therefore,  $\text{LoD} = 10^{(3 \times \Delta R_{ct}/R_{ct}^0 - 1.0078)/0.0866} = 10^{(3 \times 0.0151 + 1.0078)/0.0866} = 7.68 \text{ pM}$ . The calculated LOD of the developed sensor was 7.68 pM.

A)

MSYYHHHHHDYDIPTTENLYFQGASQVQLVETGGGFVQPGGSLRLSCAASGVTLDYAIGWFRQAP  
GKEREGVSCIGSSDGRITYYSDSVKGRFTISRDNANKNTVYLMNSLKPEDTAVYYCALTVGITYYSG  
NYHYTCSDDMDYWGKGTQVTVSSGAGSGSGSGRVTNKKIVSSLQTTVEADGQSSTA EKSAEVTEN  
KDG VNVVD TIHYKGLIPKQKYEVVGILYE VKDGKLVDPNKPITISNGTGEYTVSDSGEGEWKLN F  
GKIDGVEARKSYVVYEEVTSVENLVDTDNDGNTS

B)

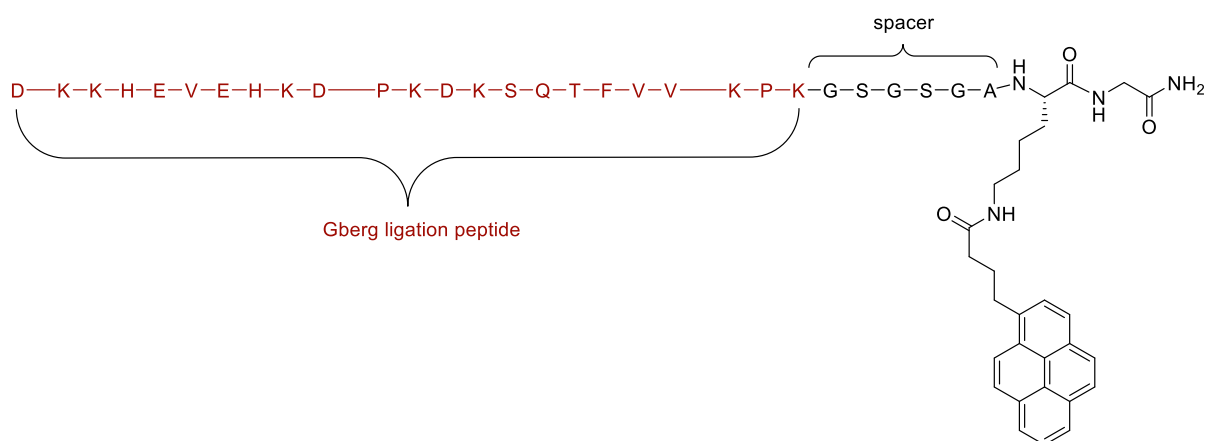

**Figure S1.** (A) Sequence of VHH E nanobody fused with EsterLigase. The N-terminal His<sup>6</sup> IMAC tag and rTEV protease recognition sequence are underlined and removed from the purified VHH E EsterLigase recombinant protein. The VHH E nanobody sequence (grey) is linked to the *Gemella bergeriae* (Gberg) EsterLigase domain (yellow) via a flexible linker (red). (B) Structure of pyrene-modified E-Tag. The E-Tag is composed of a Gberg ligation peptide with a C-terminal spacer that is conjugated to pyrene via the lysine N<sup>ε</sup> amino group.

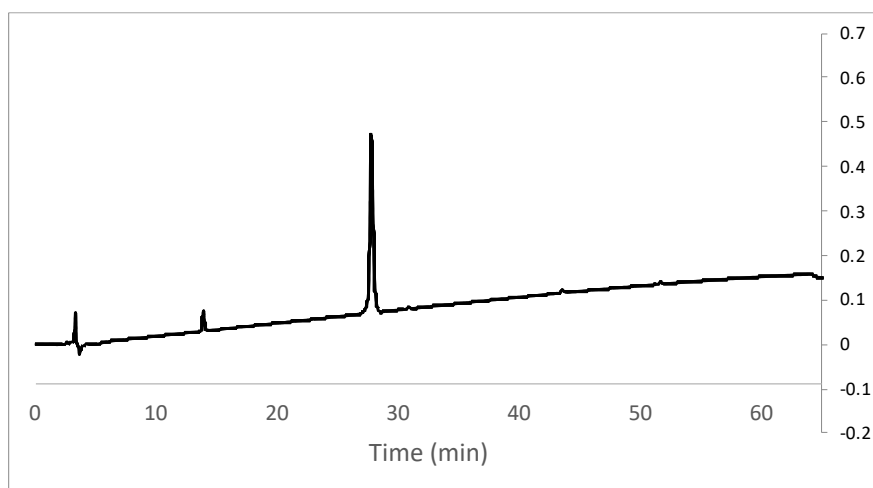

**Figure S2.** Analytical RP-HPLC for pyrene-modified E-Tag. RP-HPLC profile (214 nm) of pyrene modified E-Tag peptide.  $t_R$  27.8 min, Phenomenex Luna C18 (100Å, 5  $\mu$ m, 4.6 mm x 250 mm), linear gradient 5%B to 65%B (*ca.* 1%B/min) at 1 mL/min.

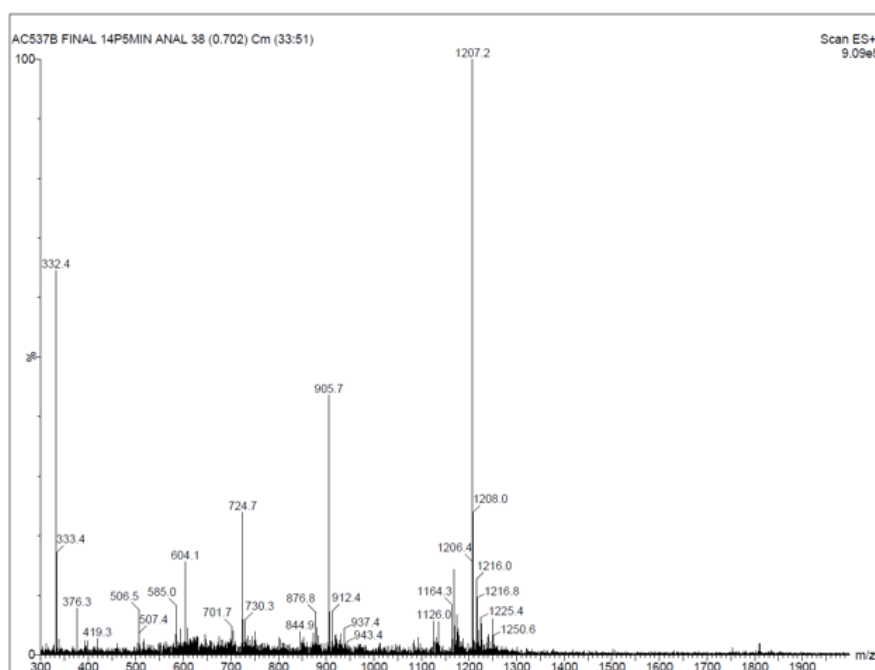

**Figure S3.** ESI-MS data for pyrene-modified E-Tag. Pyrene modified synthetic peptide ESI-MS (+ve) data.  $m/z$  calculated for  $[C_{165}H_{253}N_{45}O_{47}]$  3617.9; mass observed deconv:  $3618.6 \pm 0.13$ . Charge states; 604.1  $[M+6H]^{6+}$ , 724.7  $[M+5H]^{5+}$ , 905.7  $[M+4H]^{4+}$ , 1207.2  $[M+3H]^{3+}$ .

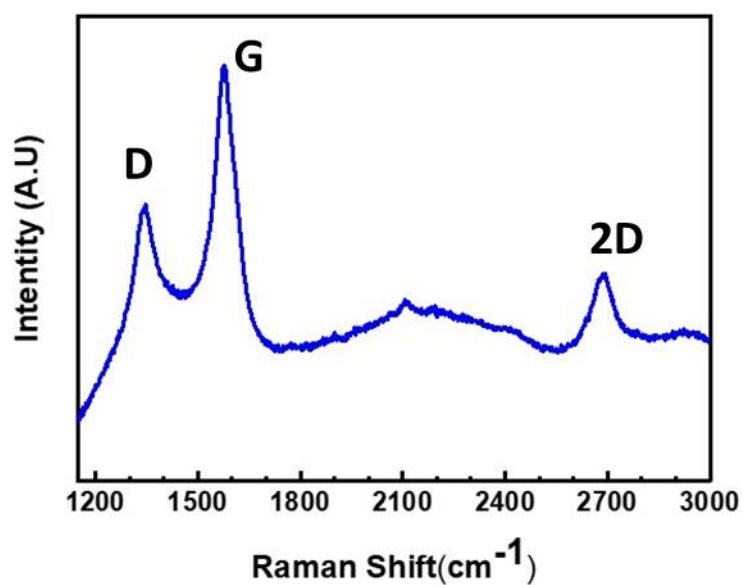

**Figure S4.** The Raman spectrum of the LSG. Excitation wavelength: 523 nm.

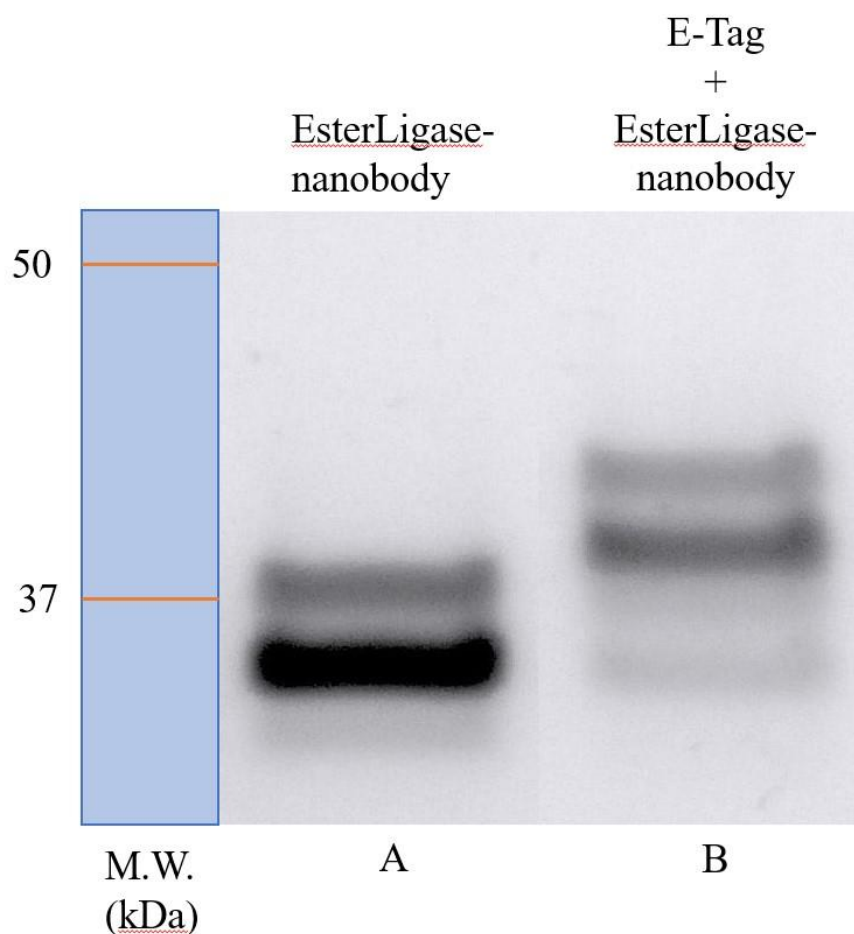

**Figure S5.** SDS-PAGE analysis (12% acrylamide gel) for ester bond formation. **Lane A:** EsterLigase-nanobody. **Lane B:** E-Tag and EsterLigase-nanobody allowed for overnight ligation reaction. Two species are visible from SDS-PAGE as the nanobody

is not fully reduced.

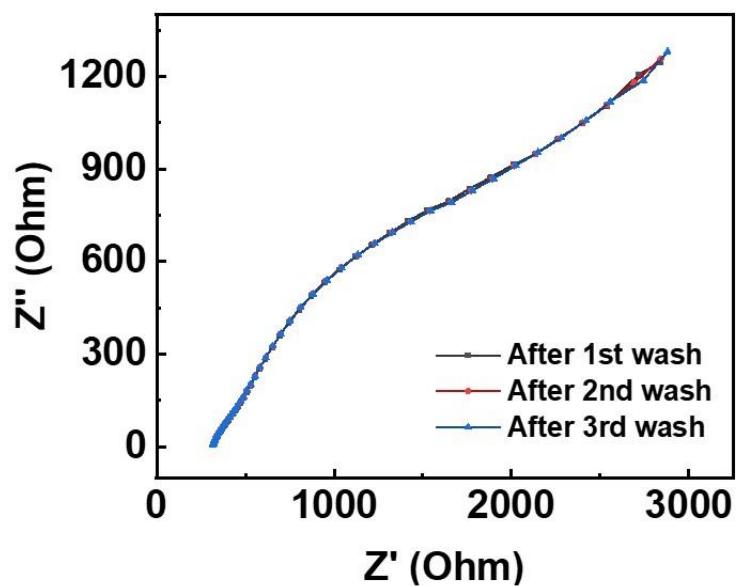

**Figure S6.** EIS spectra of LSG/PBA-pyrene-E-Tag linker/EsterLigase-nanobody after 1, 2 and 3 times washes with PBS buffer.

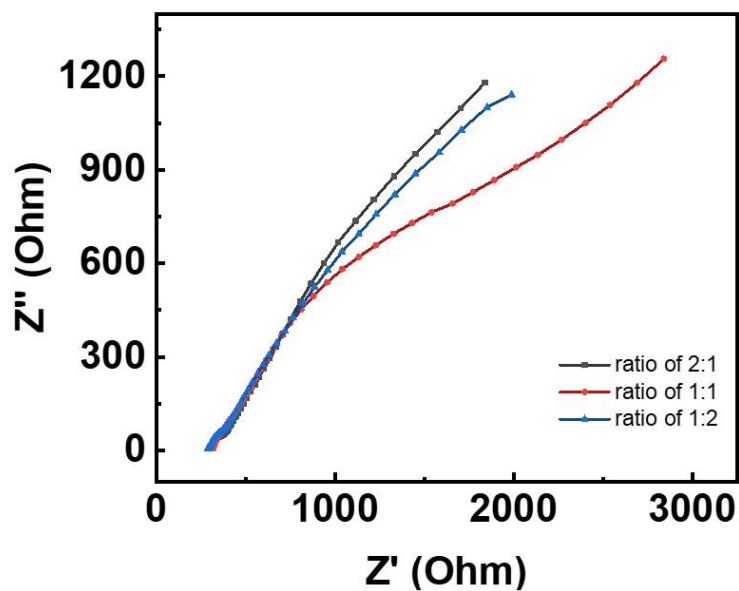

**Figure S7.** EIS spectra from the sensors with three different molar ratios of PBA to pyrene-E-Tag linker.

## Reference

1. Armbruster, D.A.; Pry, T. Limit of blank, limit of detection and limit of quantitation. *Clin. Biochem. Rev.* **2008**, *29*, S49–S52.
